# Supplementary material
Source: ML conference proceedings conference paper supplement (https://openaccess.thecvf.com/content/cvpr_2015/html/Escorcia_On_the_Relationship_2015_CVPR_paper.html)

# On the Relationship between Visual Attributes and Convolutional Networks

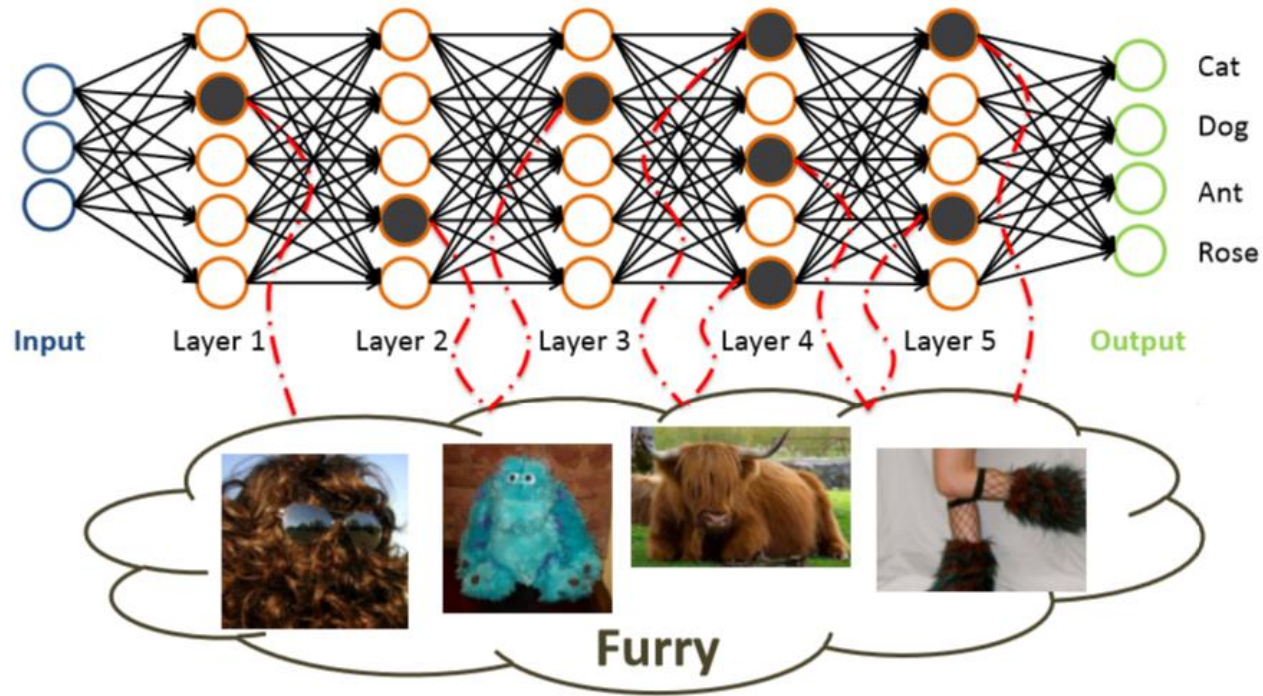

Victor Escorcia, Juan Carlos Niebles, Bernard Ghanem

King Abdullah University of Science and Technology (KAUST), Saudi Arabia  
Universidad del Norte, Colombia

# Overview

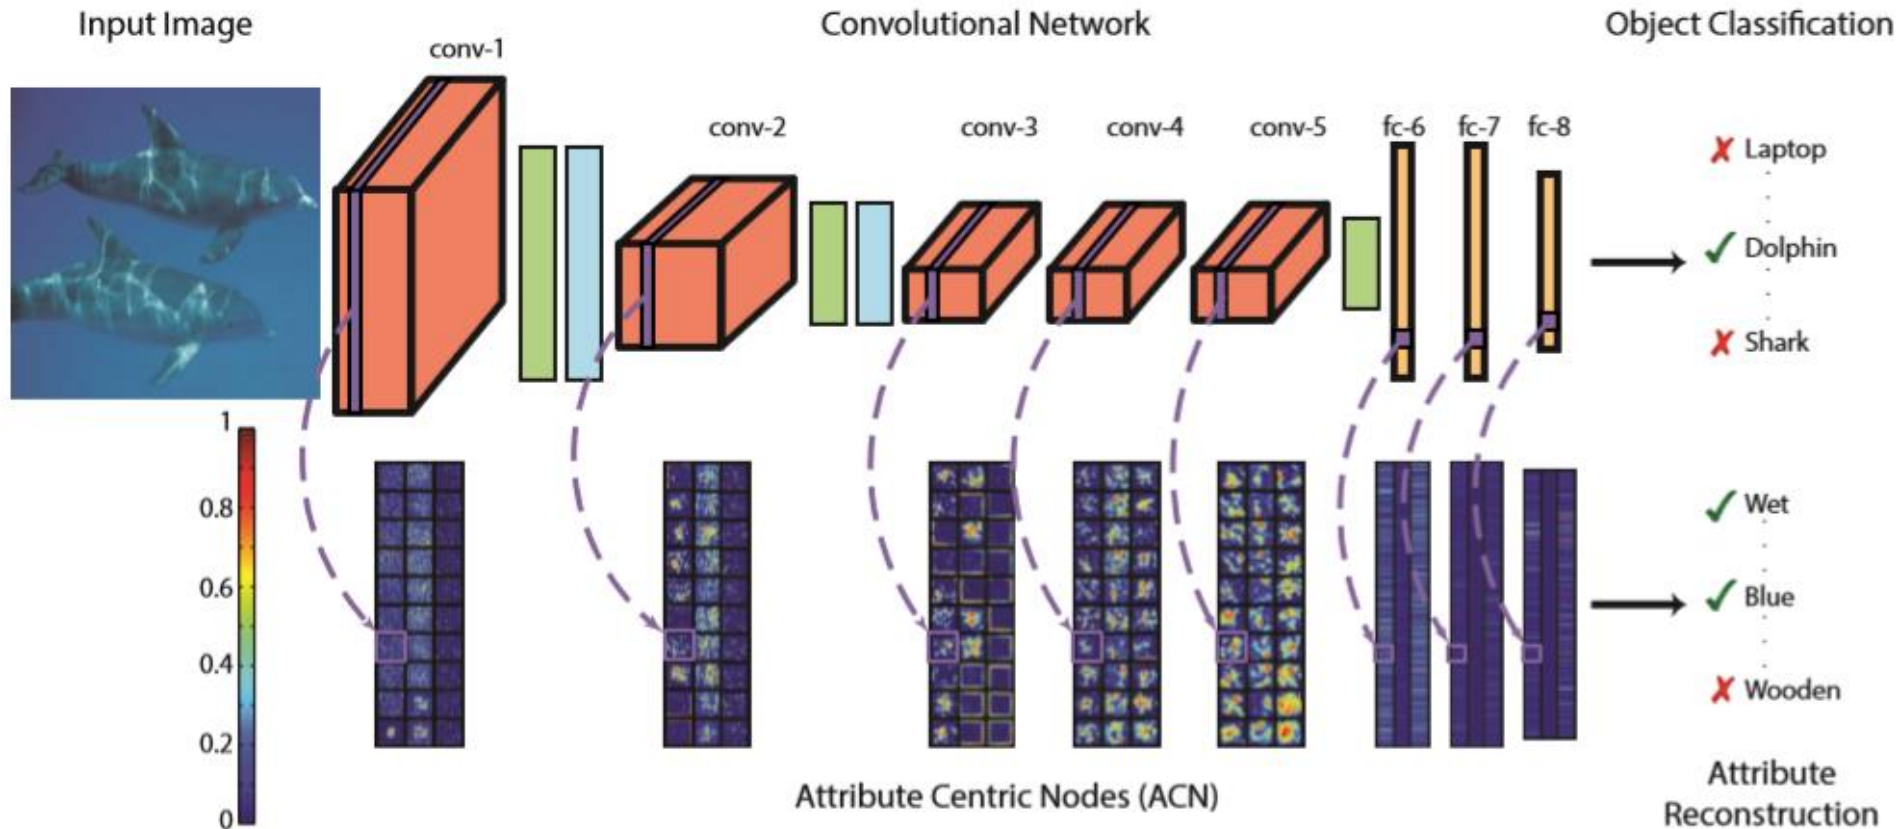

We empirically show that a sparse number of nodes in a conv-net, trained to recognize objects (e.g. 'dolphin'), inherently encode information about semantic visual attributes (e.g. 'wet'). We call these activation locations Attribute Centric Nodes (ACNs).

# Main Findings

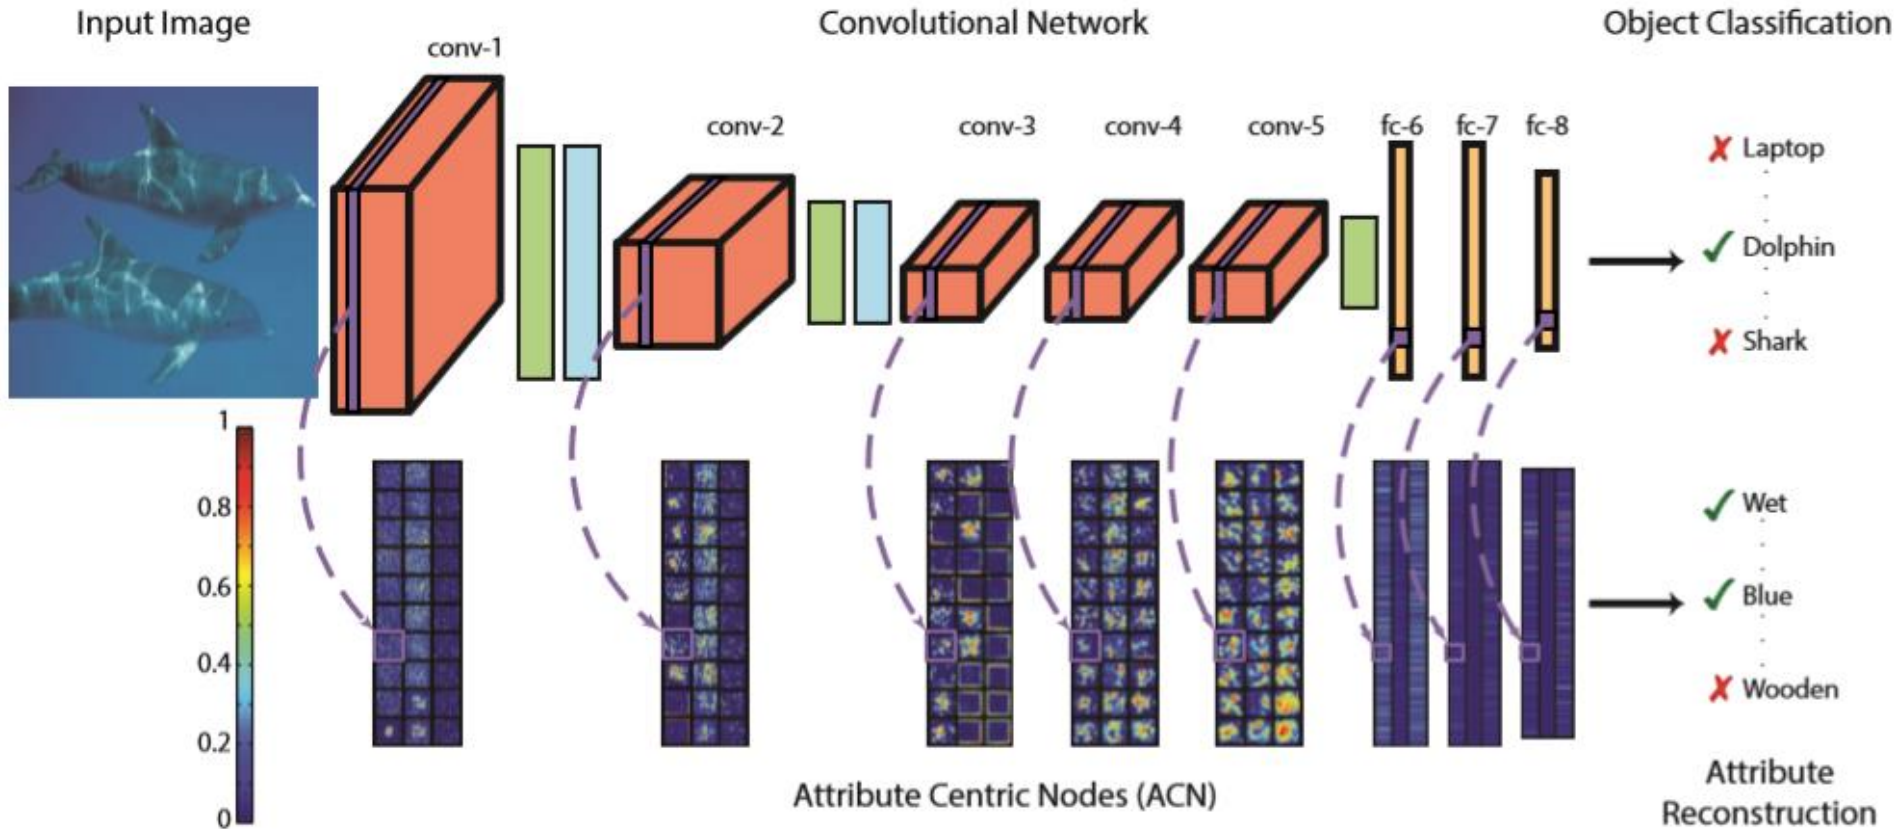

1. ACNs exist. They are sparse and powerful representations to recover attributes.
2. ACNs are unevenly distributed throughout the network and are attribute specific. ACNs of co-occurring attributes tend to be similar.
3. ACNs are important for object classification.

# 1. ACNs Existence

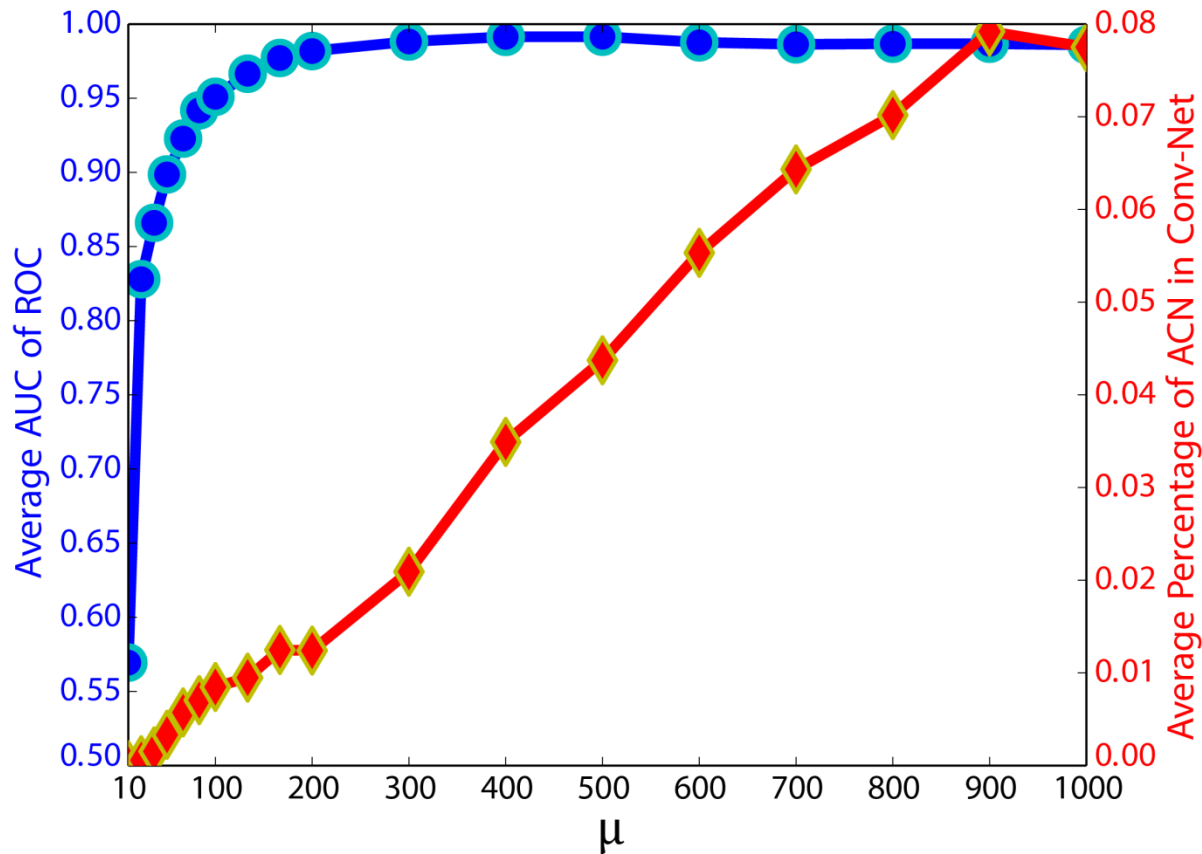

We found that only a small percentage of ACNs is required to produce near perfect reconstruction. At  $\mu = 200$  (1.2% of the conv-net nodes), the AUC-ROC score stabilizes, which is evidence that ACNs are truly sparse in the conv-net.

$\mu$  is a hyper-parameter to trade-off sparsity and reconstruction. Check details in the paper.

# 1. ACNs Existence

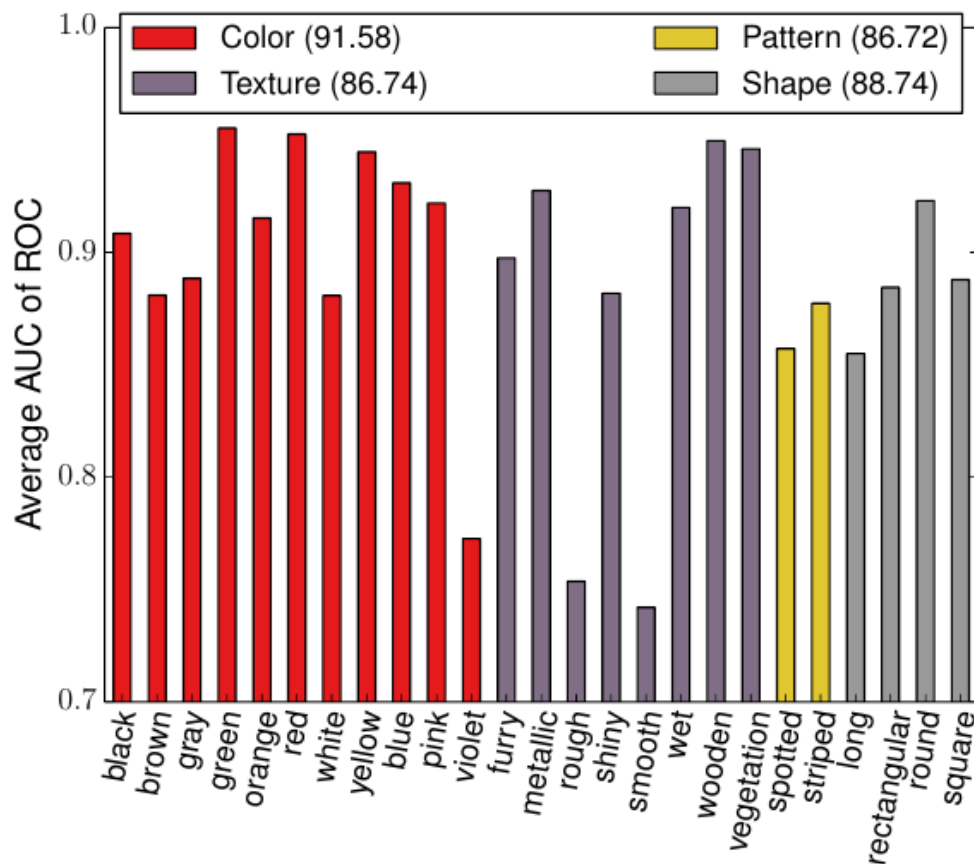

| Attribute Group   | [15]  | Our          |
|-------------------|-------|--------------|
| Color (8 attr)    | 87.5% | 91.6%        |
| Texture (7 attr)  | 77.5% | 86.7%        |
| Pattern (2 attr)  | 63.4% | 86.7%        |
| Shape (3 attr)    | 83.6% | 88.7%        |
| Overall (20 attr) | 80.8% | <b>89.0%</b> |

ACNs are powerful features for attribute prediction. They record an improvement around 10% against multiple hand-crafted features with non-linear kernels [15].

# 1. ACNs Existence

| Attribute Group   | Our          | SVM FC-6 | SVM FC-7 | SVM FC-8 |
|-------------------|--------------|----------|----------|----------|
| Color (11 attr)   | 90.5%        | 88.1%    | 89.6%    | 87.5%    |
| Texture (8 attr)  | 87.7%        | 84.3%    | 83.9%    | 85.5%    |
| Pattern (2 attr)  | 86.7%        | 87.6%    | 86.9%    | 85.9%    |
| Shape (4 attr)    | 88.8%        | 90.4%    | 90.9%    | 89.0%    |
| Overall (25 attr) | <b>89.0%</b> | 87.2%    | 87.7%    | 86.9%    |

In general, attribute prediction based on ACNs is better than attribute prediction of one robust classifier trained over the activations of a single fully-connected layer.

It suggests that some attributes take advantage of activations from lower hidden layers.

## 2. Distribution of ACNs

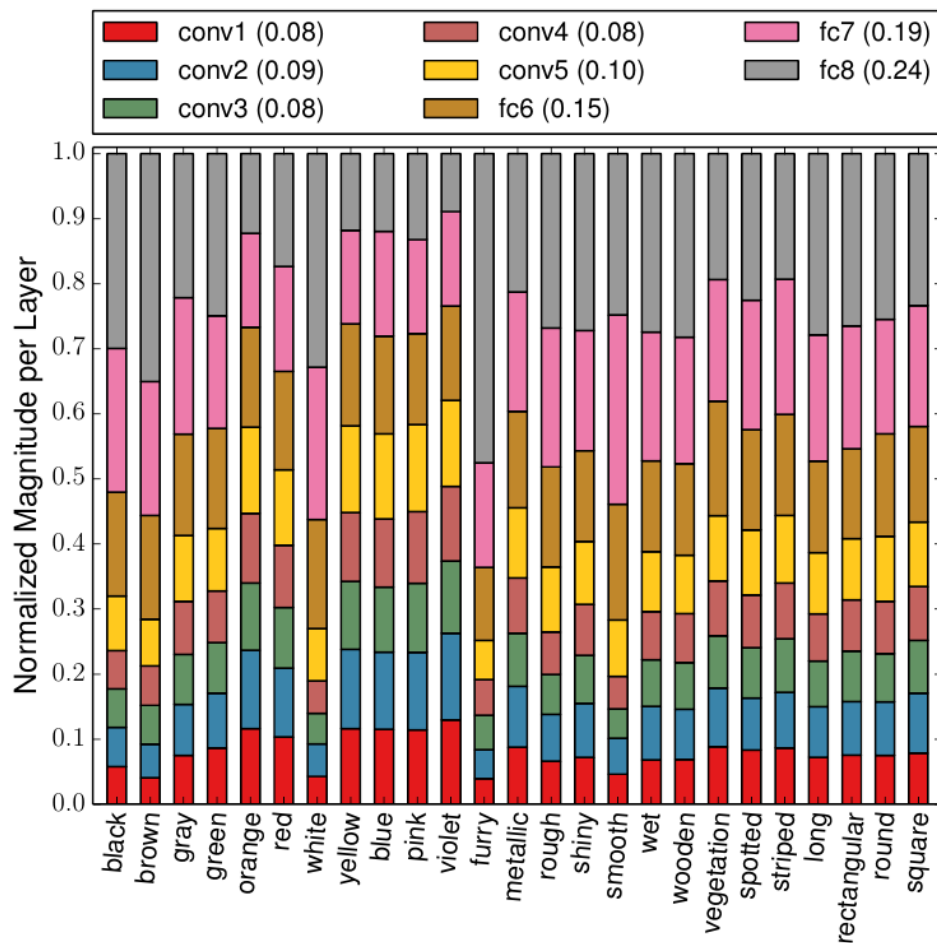

We study the importance of the ACN with respect to their localization in the conv-net, for each attribute. The average normalized contribution of each layer is reported in parentheses.



## 2. Distribution of ACNs

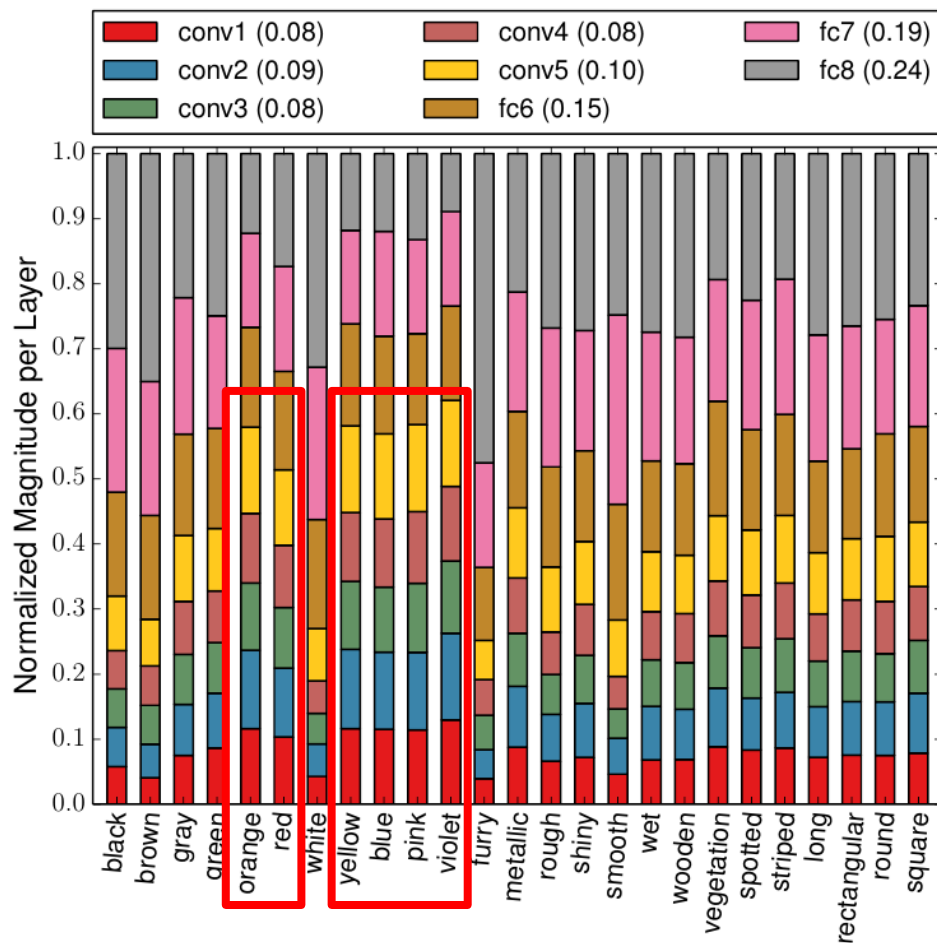

ACN localization is attribute dependent. For example, color attributes tend to be represented well by activations from the convolutional layers.



## 2. Distribution of ACNs

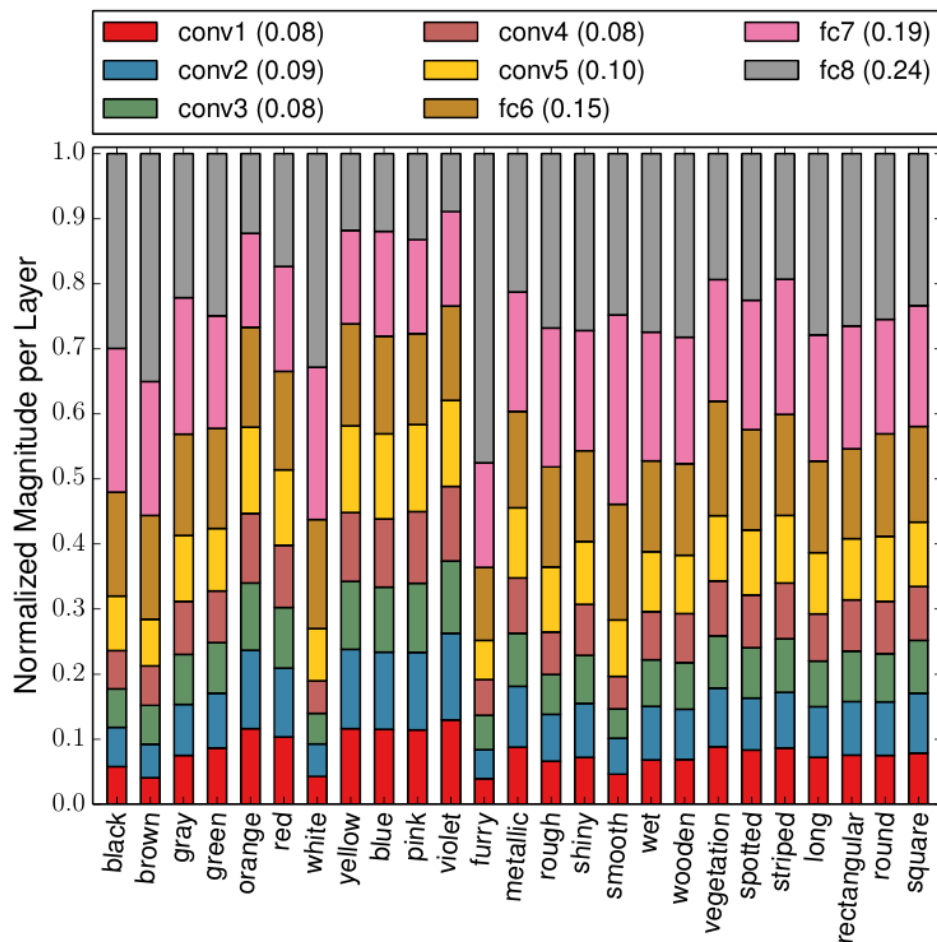

In general, the most *important* activations are localized on higher layers. This is experimental support for the common practice of using features from the fully-connected layers

## 2. Distribution of ACNs

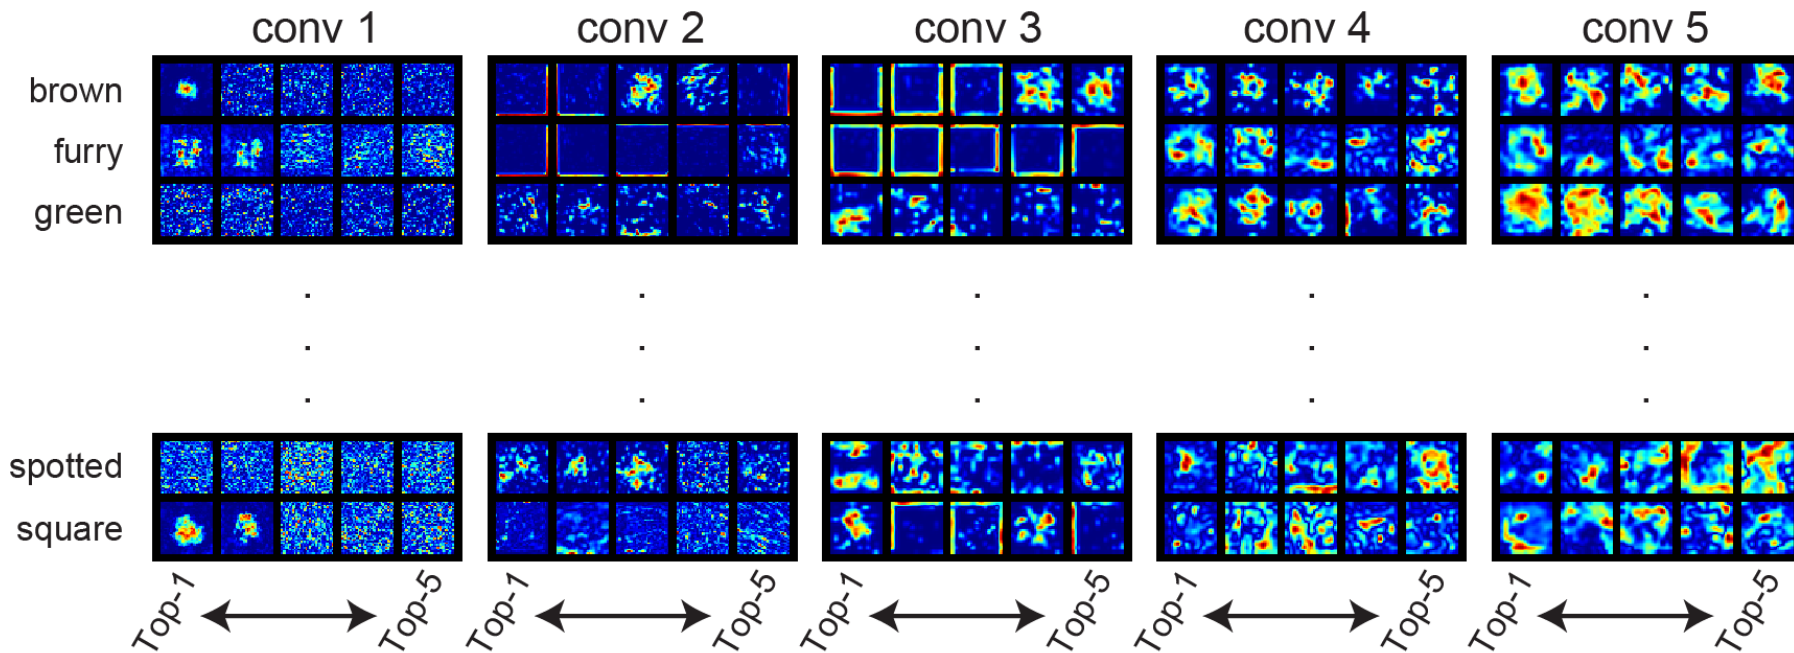

The visual pattern of ACNs in convolutional layers is diverse. It tends to be spatially structure-less in lower convolutional layers while it becomes more centralized and spatially contiguous in higher layers.

## 2. Distribution of ACNs

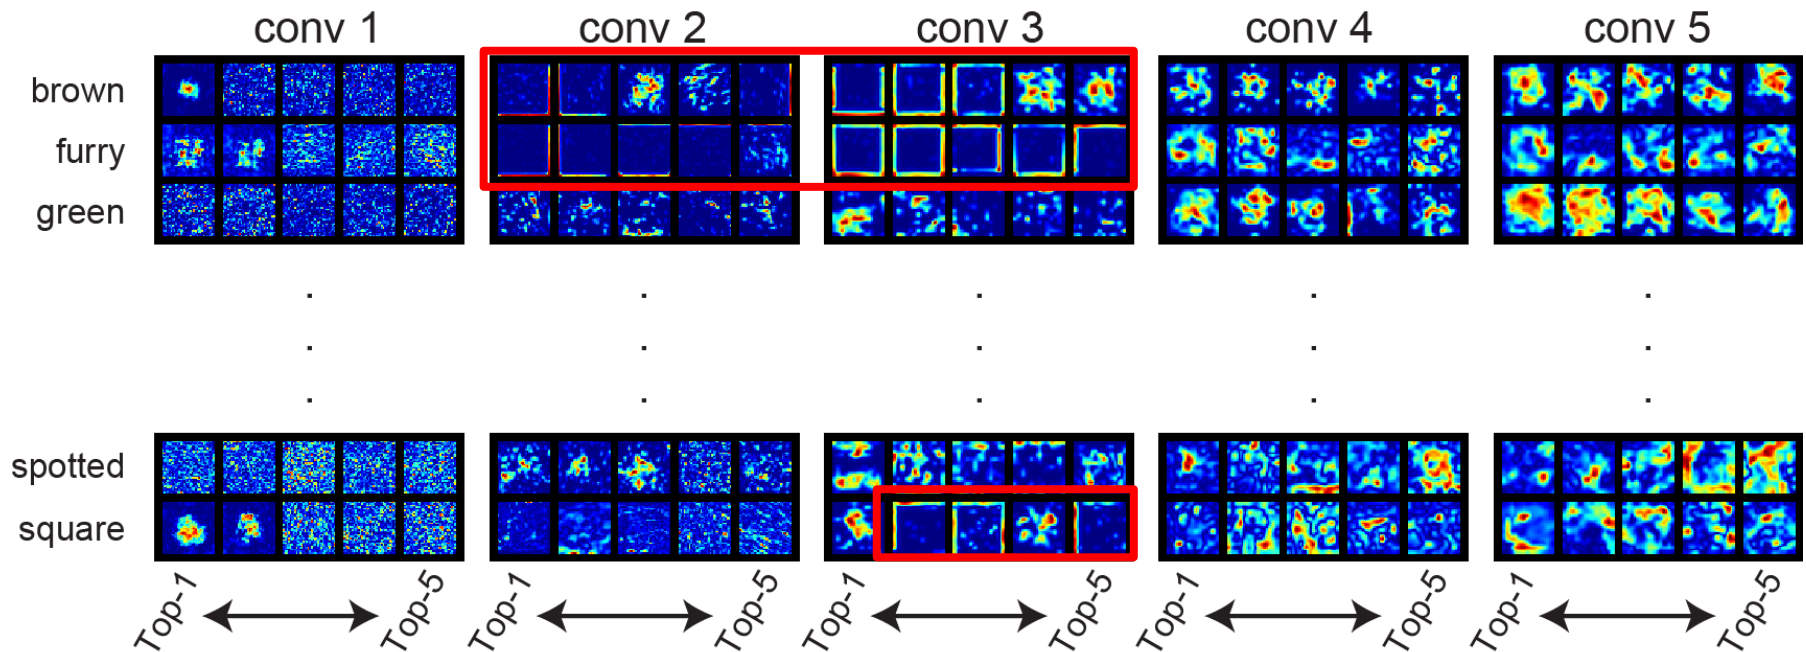

Interestingly, some layers (e.g. conv2 and conv3) of some attributes contain ACNs in local patterns around image borders suggesting some form of learned context.

# 3. Impact of ACNs on Object Recognition

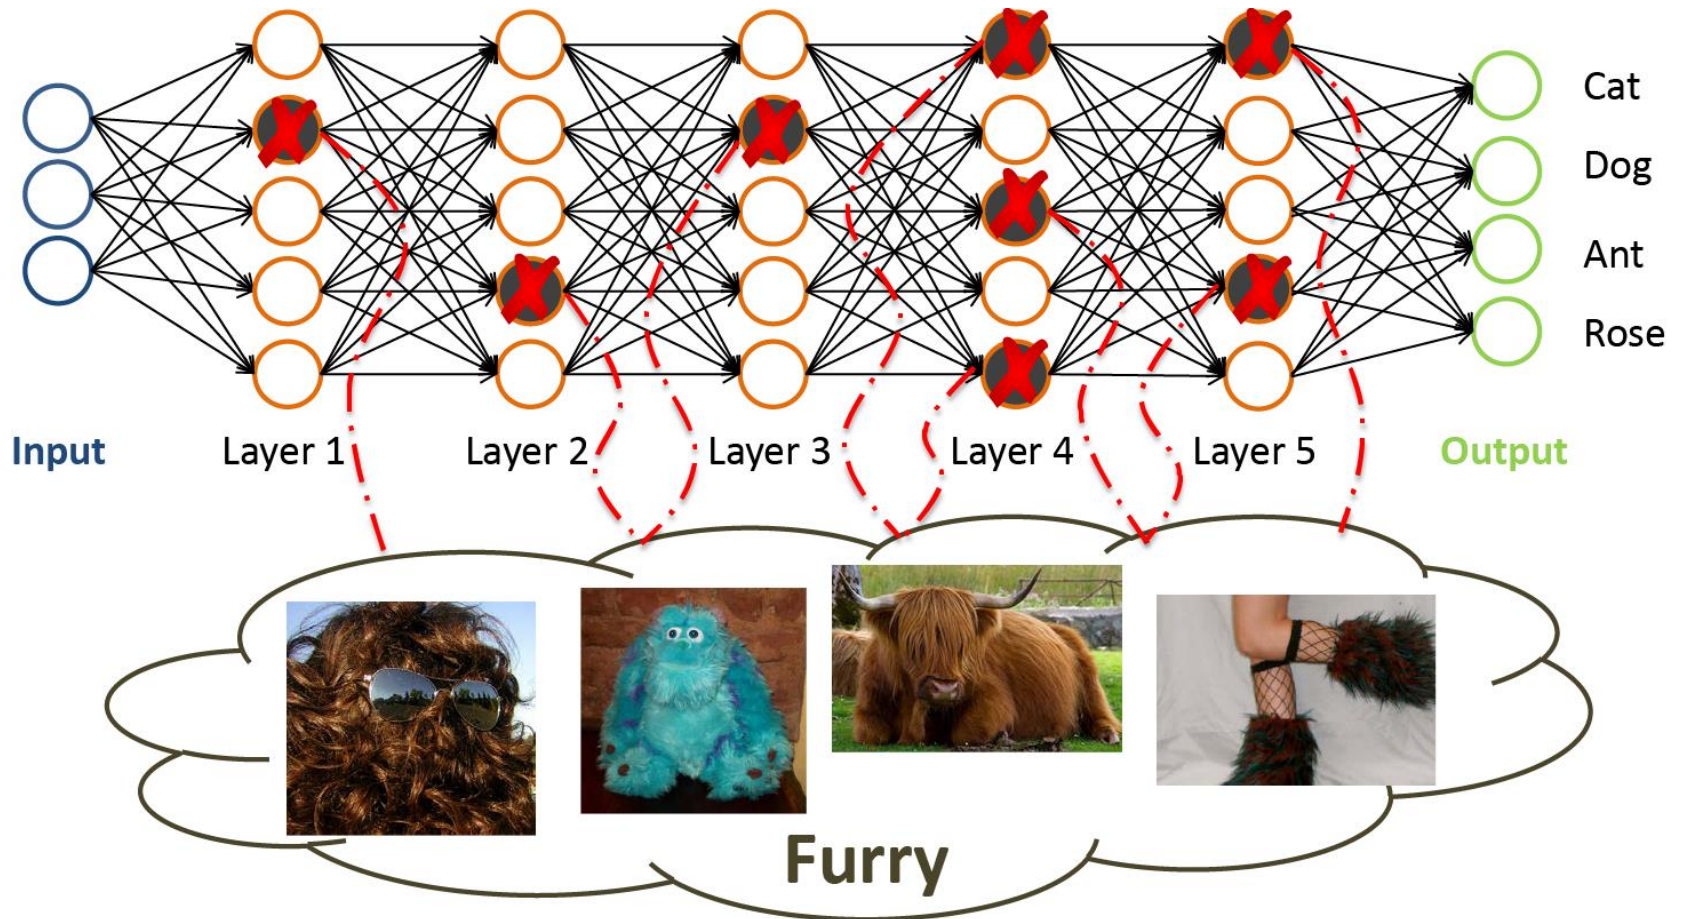

We perform an ablation study to measure the impact of ACNs on object classification.

We compare ACN ablation to random node ablation.

# 3. Impact of ACNs on Object Recognition

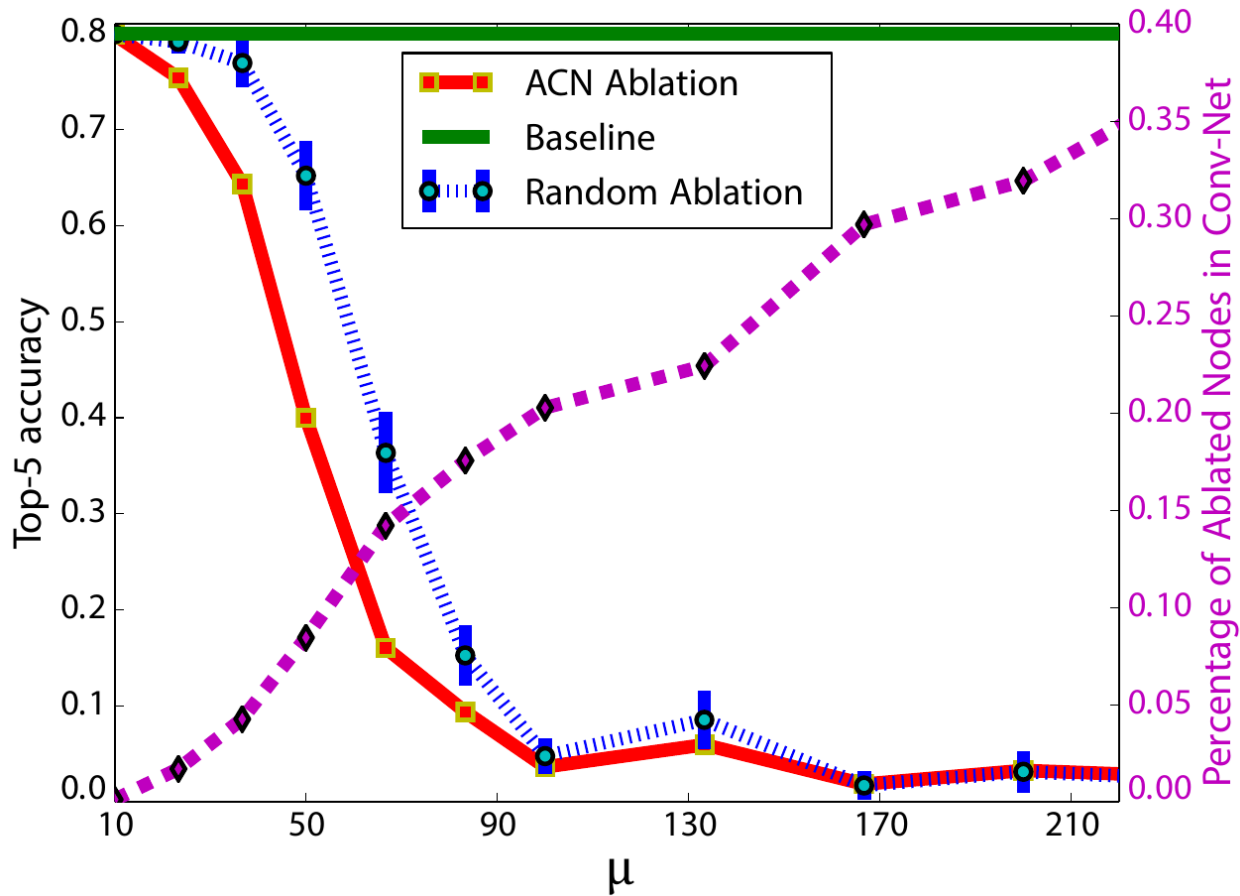

We ablated ACNs associated with all 25 absolute attributes. Both ablation methods show a steep drop-off as  $\mu$  increases. However, the difference in accuracy between the two is significant.

This suggests that ACNs encode important information used by the conv-net for recognition.

The small standard deviation of random ablation is scaled up to be visually perceivable.



# 3. Impact of ACNs on Object Recognition

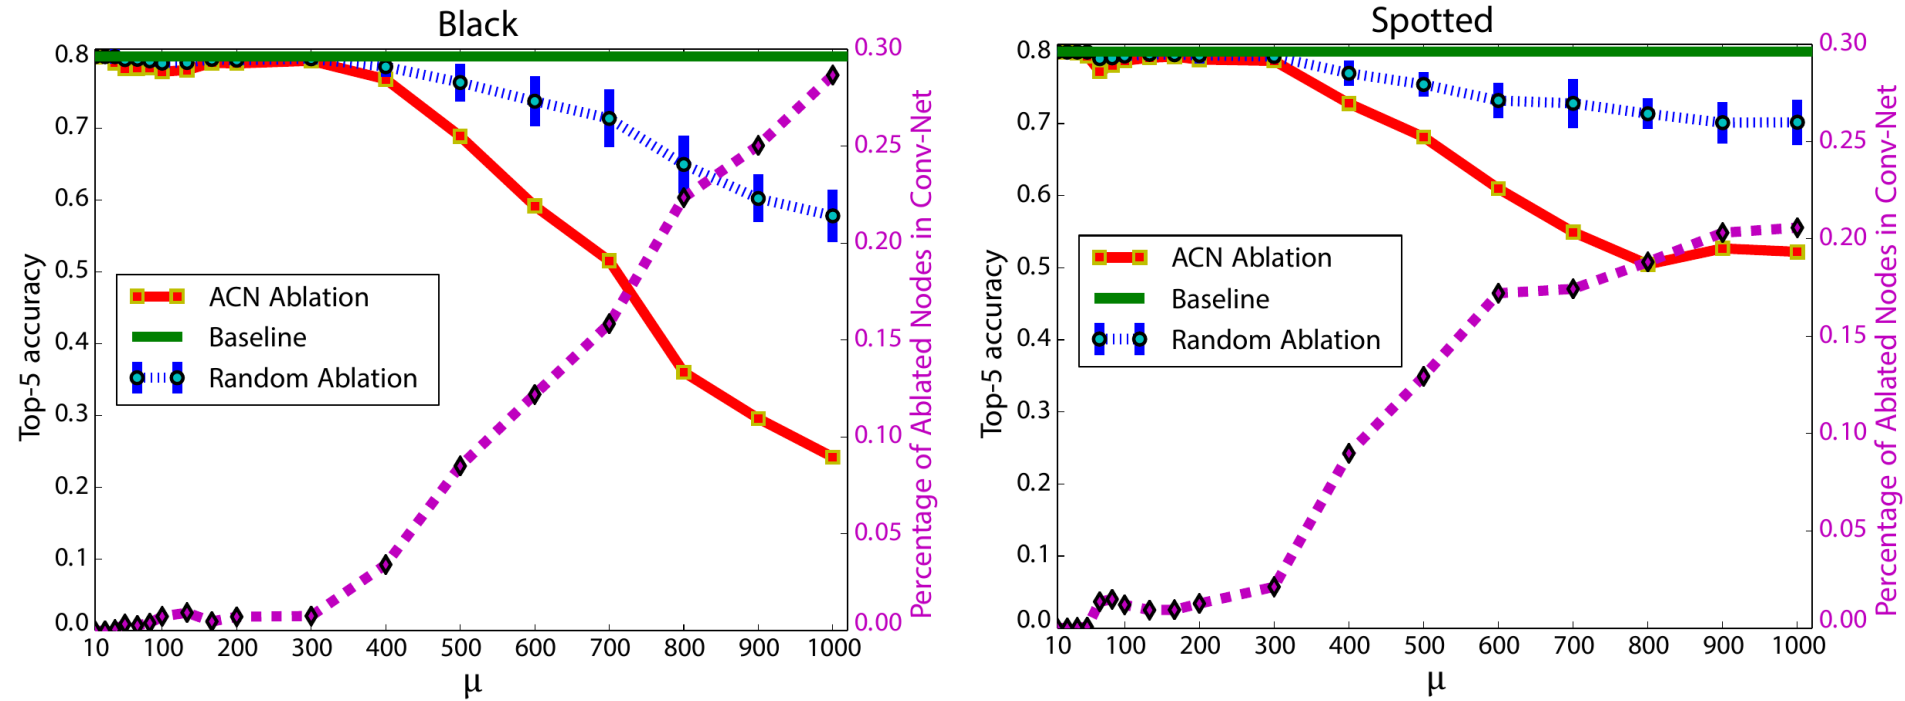

We also remove ACNs for each attribute separately. Similarly, we observe that ACN ablation produces a more drastic drop-off than random nodes ablation.

The small standard deviation of random ablation is scaled up to be visually perceivable.

# 3. Impact of ACNs on Object Recognition

|        |                                                                                   |                                                                                   |                                                                                   |                                                                                   |                                                                                    |                                                                                     |                                                                                     |                                                                                     |                                                                                     |                                                                                     |
|--------|-----------------------------------------------------------------------------------|-----------------------------------------------------------------------------------|-----------------------------------------------------------------------------------|-----------------------------------------------------------------------------------|------------------------------------------------------------------------------------|-------------------------------------------------------------------------------------|-------------------------------------------------------------------------------------|-------------------------------------------------------------------------------------|-------------------------------------------------------------------------------------|-------------------------------------------------------------------------------------|
| Green  |  |  |  |  |  |  |  |  |  |  |
| Red    | Butternut Squash<br>(-0.50)                                                       | Pomegranate<br>(-0.42)                                                            | Acorn<br>(-0.36)                                                                  | Spaghetti Squash<br>(-0.36)                                                       | Banana<br>(-0.31)                                                                  | Acorn Squash<br>(-0.31)                                                             | Orange<br>(-0.29)                                                                   | Guacamole<br>(-0.26)                                                                | Strawberry<br>(-0.26)                                                               | Beer Glass<br>(-0.24)                                                               |
| Orange |  |  |  |  |  |  |  |  |  |  |
| Yellow | Wing<br>(0.06)                                                                    | American Chameleon<br>(0.05)                                                      | Sweatshirt<br>(0.05)                                                              | Sports Car<br>(0.05)                                                              | Analog Clock<br>(0.05)                                                             | B&G Garden Spider<br>(0.05)                                                         | Space Heater<br>(0.04)                                                              | Maillot<br>(0.04)                                                                   | Academic Gown<br>(0.03)                                                             | Washbasin<br>(0.03)                                                                 |

We also found semantic relationships between ablated ACNs of specific attributes and **the most** (and **least**) affected object categories. The drop-off in mean average precision is reported in parentheses.



# 3. Impact of ACNs on Object Recognition

Black  
Brown  
Furry

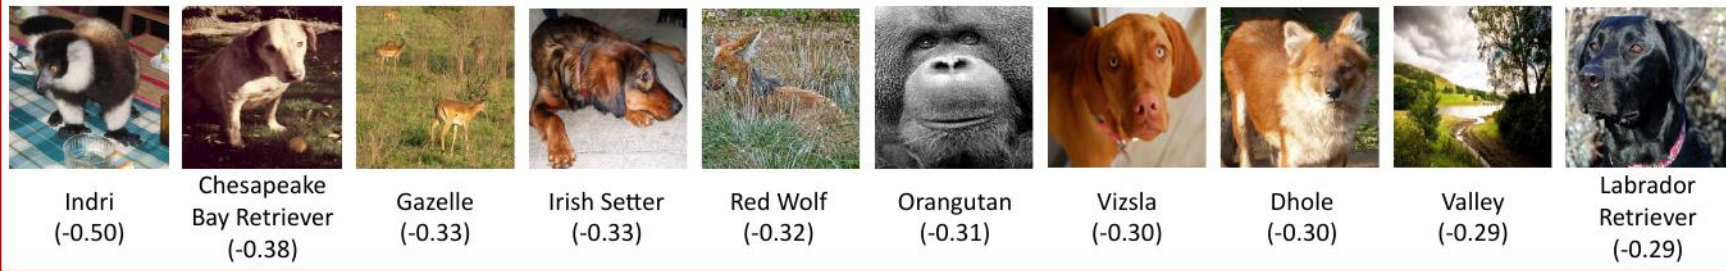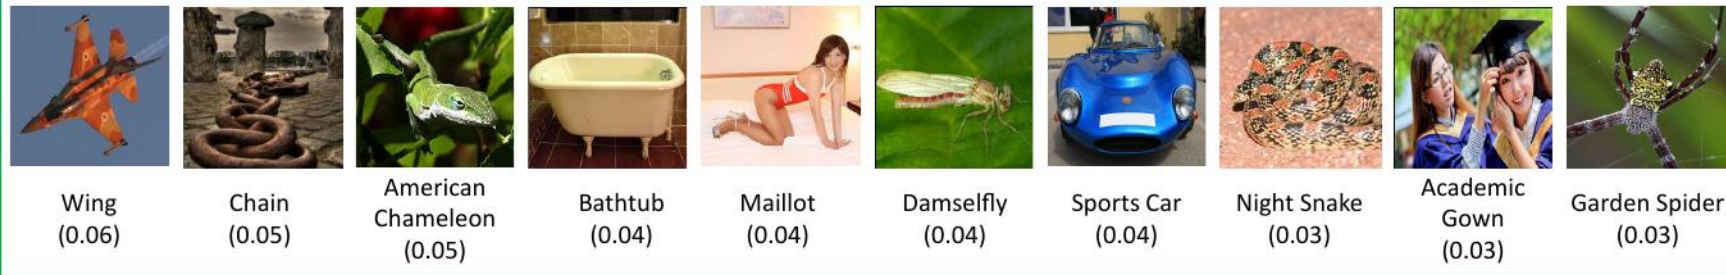

Green  
Brown  
Wooden

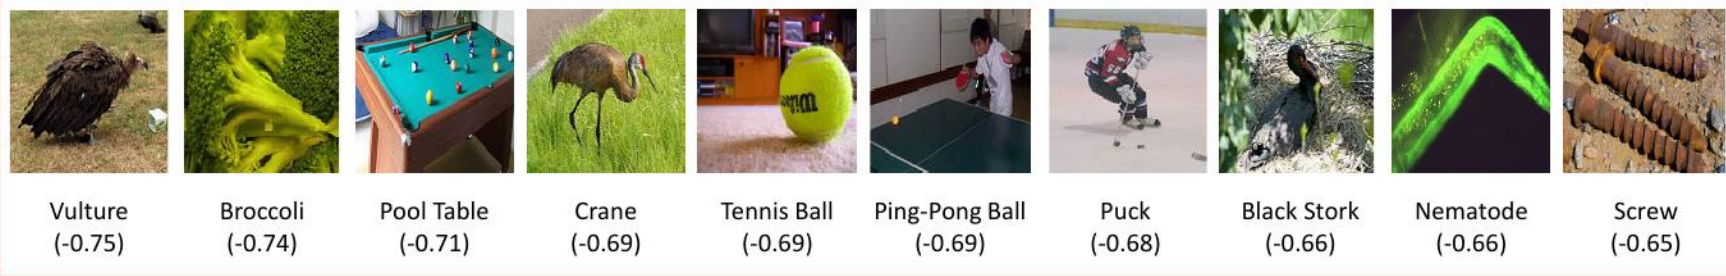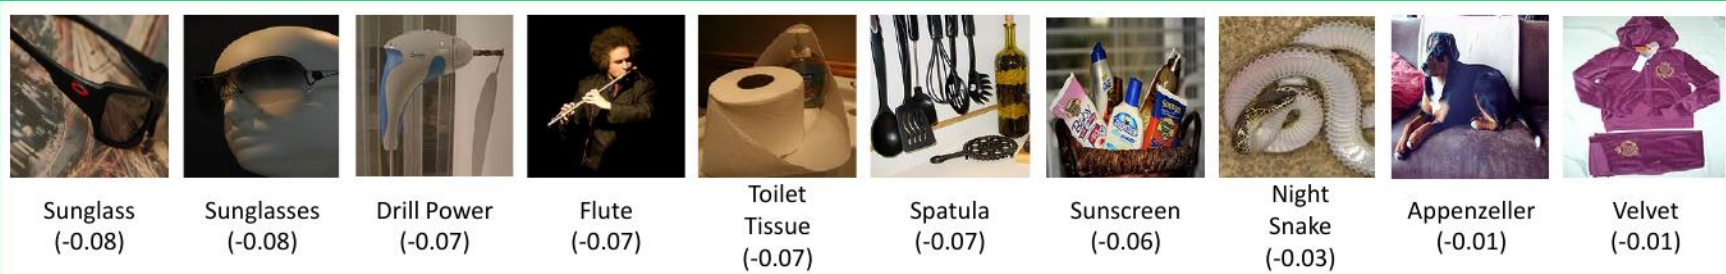



# 3. Impact of ACNs on Object Recognition

Gray  
Metallic  
Shiny

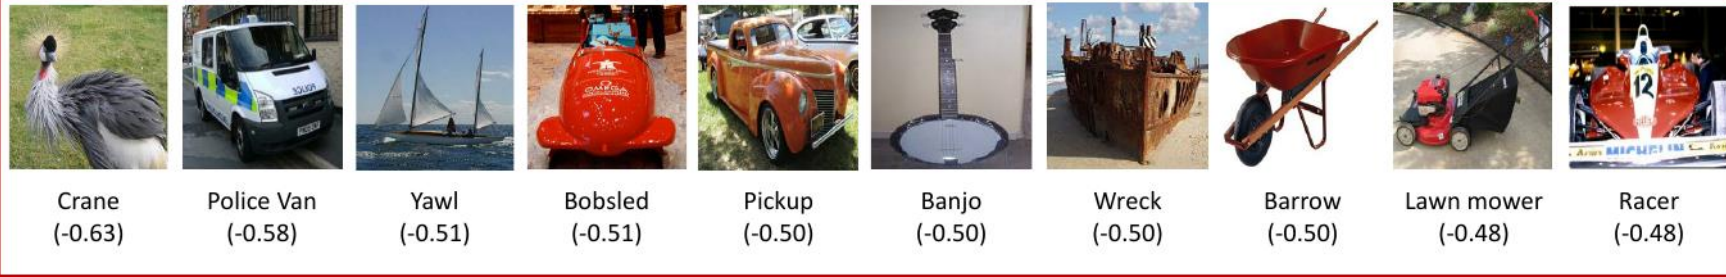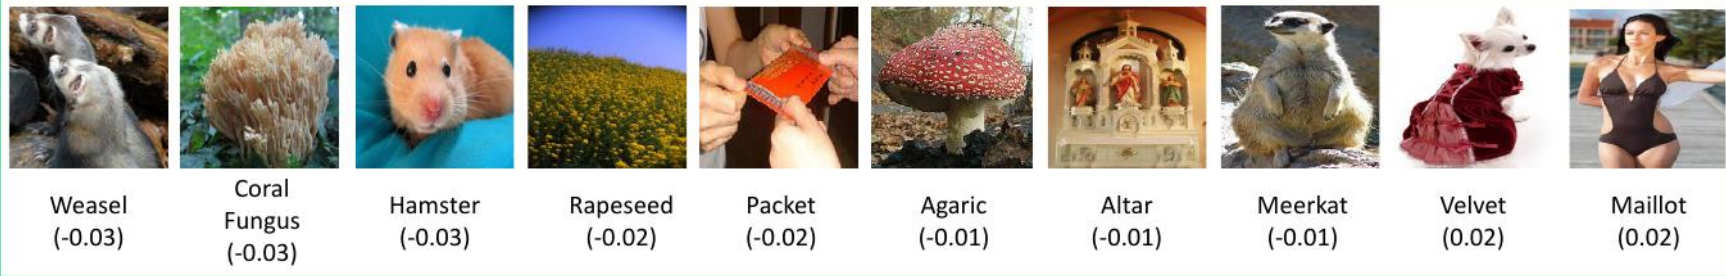

Furry  
Gray  
White

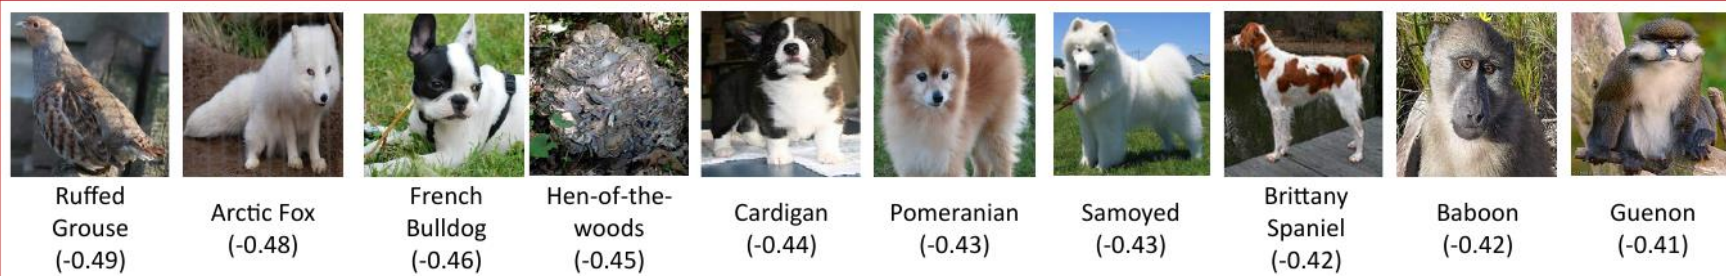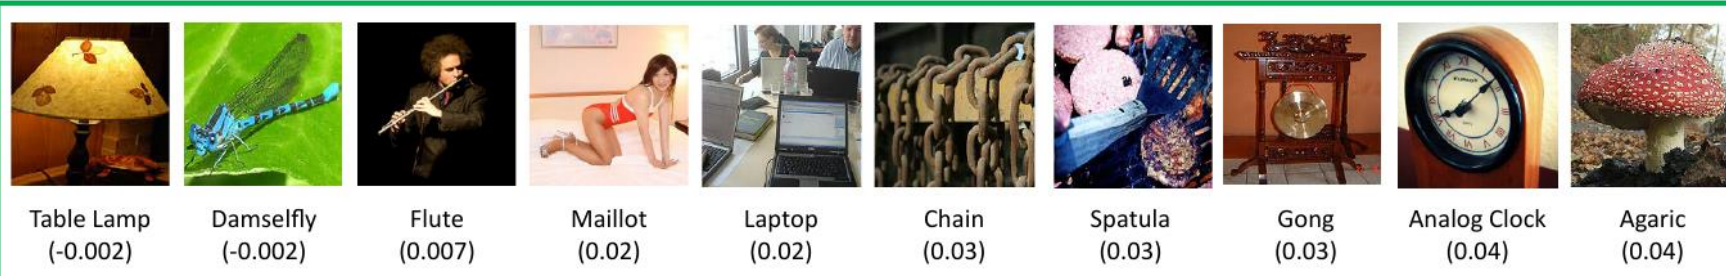

# Acknowledgements

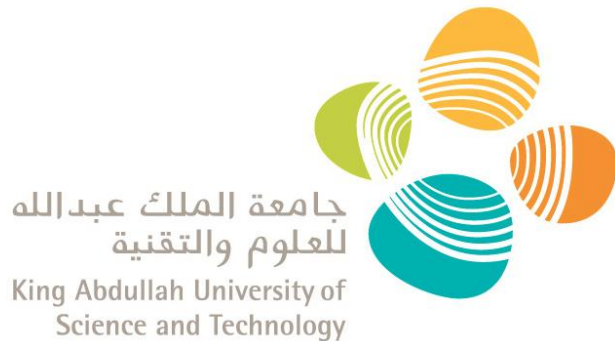

BG: Competitive  
Research Funding

VE: Visiting Student  
Research Program  
(VSRP)

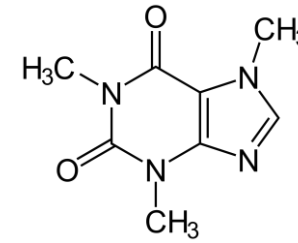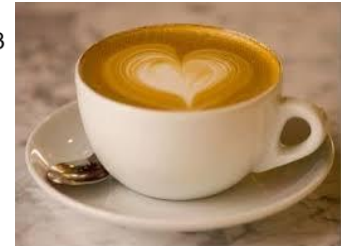

[caffe.berkeleyvision.org](http://caffe.berkeleyvision.org)

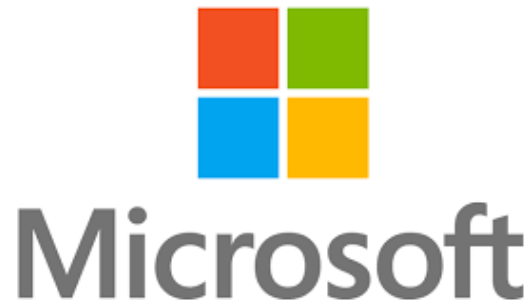

JCN: Microsoft  
Research Faculty  
Fellowship

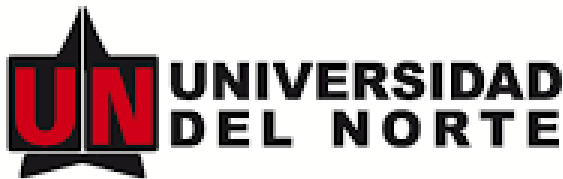

Barranquilla - Colombia

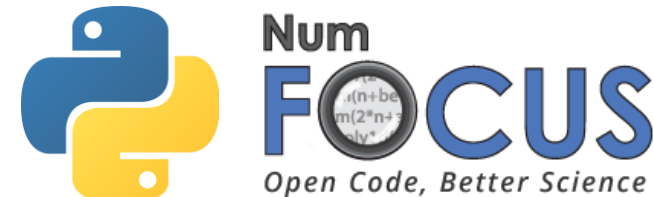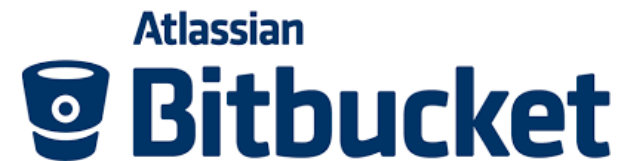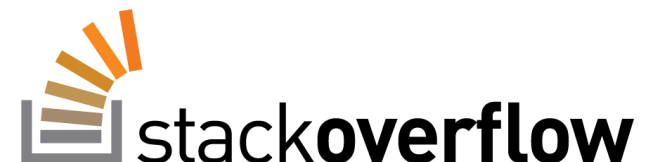

Supplement: Supplementary file 1 [file 0052-ppt.pdf › 0052-supp/0052-ppt.pdf]
