# Supplementary material
Source: ML conference proceedings conference paper supplement (https://openaccess.thecvf.com/content/cvpr_2015/html/Escorcia_On_the_Relationship_2015_CVPR_paper.html)
Supplement: Supplementary file 3 [file Escorcia_On_the_Relationship_2015_CVPR_supplemental.zip]

Archive with 2 entries (2 files):
- 0052-supp/0052-ppt.pdf
- 0052-supp/0052-supp.pdf
